## 1 **The California environmental DNA "CALeDNA" program**

2 Rachel S Meyer<sup>1\*</sup>, Emily E Curd<sup>1</sup>, Teia Schweizer<sup>1</sup>, Zack Gold<sup>1</sup>, Dannise Ruiz Ramos<sup>2</sup>,  
3 Sabrina Shirazi<sup>3</sup>, Gaurav Kandlikar<sup>1</sup>, Wai-Yin Kwan<sup>1</sup>, Meixi Lin<sup>1</sup>, Amanda Freise<sup>1</sup>, Jordan  
4 Moberg-Parker<sup>1</sup>, Miroslava Munguia Ramos<sup>4</sup>, Beth Shapiro<sup>3</sup>, Jason P Sexton<sup>2</sup>, Lenore Pipes<sup>5</sup>,  
5 Ana Garcia Vedrenne<sup>1</sup>, Maura Palacios Mejia<sup>1</sup>, Emma L Aronson<sup>6</sup>, Tiara Moore<sup>1</sup>, Rasmus  
6 Nielsen<sup>5</sup>, Harris Lewin<sup>4</sup>, Paul Barber<sup>1</sup>, Jeff Wall<sup>6</sup>, Nathan Kraft<sup>1</sup>, Robert K Wayne<sup>1\*</sup>

7

8 1. University of California - Los Angeles

9 2. University of California - Merced

10 3. University of California - Santa Cruz

11 4. University of California - Davis

12 5. University of California – Berkeley

13 6. University of California - Riverside

14 7. University of California - San Francisco

15

16 Corresponding authors: Robert Wayne ([rwayne@g.ucla.edu](mailto:rwayne@g.ucla.edu)) and Rachel S Meyer  
17 ([rsmeier@g.ucla.edu](mailto:rsmeier@g.ucla.edu))

18

19 Glossary at the end

20

21

## 22 **Abstract**

23 Global change is leading to habitat shifts that threaten species persistence throughout

24 California's unique ecosystems. Baseline biodiversity data provide opportunities for

25 ecosystems to be managed for community complexity and connectivity. In 2017, the

26 University of California Conservation Genomics Consortium launched the California

27 Environmental DNA (CALeDNA) program, a community science initiative monitoring

28 California's biodiversity through environmental DNA (eDNA)—DNA shed from

29 organisms through fur, mucus, spores, pollen, etc. Community scientists collect soil and

30 sediment samples, then researchers analyze the eDNA in the samples and share results

31 with the public. The results are catalogues of thousands of organisms per sample,

32 ranging from microbes to mammals. The CALeDNA website presents biodiversity

33 inventories in a platform designed for the public and researchers alike, as well as user-  
34 friendly analysis tools and educational modules. Here, we present CALeDNA as a  
35 scalable community science framework that can harmonize with future biodiversity  
36 research and education initiatives.

37

38

## 39 **1. Introduction**

40

41 The Earth is facing unprecedented threats to its ecosystems due to climate  
42 change, habitat destruction, pollution and other anthropogenic factors. With the 6<sup>th</sup> mass  
43 extinction of life upon us (see Ceballos and Ehrlich, 2018), policymakers and the public  
44 need more information to address the grand challenges of how to protect, conserve and  
45 restore the health of vital ecosystems that provide food, medicines, raw materials,  
46 energy, and cultural attributes essential to human survival and well-being.

47 In California, one of three North American biodiversity hotspots (Myers et al.,  
48 2000; [www.cepf.net](http://www.cepf.net)), 40 million people must find a way to thrive while protecting  
49 biodiversity. The economy of California, now ranked fifth in the world, relies heavily on  
50 natural resources industries; the state ranks first in recreation tourism, second in  
51 seafood production, third in lumber production, and has 39 mined minerals that only  
52 occur in commercial quantities in our state (to learn more see  
53 [www.conservation.ca.gov](http://www.conservation.ca.gov)).

54 Inventories of California's biodiversity are used to maintain these myriad  
55 ecosystem services residents rely on. However, detailed biodiversity data is hard to  
56 track across space and time. Fortunately, the past decade has witnessed an impressive

57 rise in grassroots ‘community science’ (syn citizen science) campaigns to gather  
58 biodiversity data, such as through ‘bioblitzes’ that monitor species presence or seasonal  
59 changes in organismal behavior, interactions, or development. While most community  
60 science initiatives are focused on gathering data, we argue that the state of California is  
61 a ‘living laboratory’ to testbed a feedback loop between the public and researchers,  
62 where all are engaged in data analysis and interpretation. With numerous world-class  
63 research institutions as well as curated living and *ex situ* natural history collections, and  
64 18% of the U.S. colleges; hundreds of thousands of people in California already engage  
65 with environmental sciences and research ([www.bls.gov](http://www.bls.gov)). In addition, California has a  
66 strong naturalist certification program, created by the UC division of Agriculture and  
67 Natural Resources, where participation in community science is part of the curriculum.

68       The University of California (UC) Conservation Genomics Consortium (hereafter  
69 “the Consortium”) launched in 2016 with support from a UC President’s Research  
70 Catalyst Award. One aim, connecting research activities across campuses, was to  
71 develop a high throughput approach for community science-driven habitat monitoring  
72 and characterization using an environmental DNA method. In early 2017, the  
73 Consortium launched the statewide community science program called CALeDNA (*Cal*  
74 *‘ee’ D-N-A*). CALeDNA is a platform for public and multi-institutional engagement in  
75 biodiversity data collection and analysis using DNA-based technologies executed in a  
76 series of steps (Figure 1). CALeDNA recruits and trains community scientists through  
77 its website, then coordinates soil and sediment collection using sampling kits and a  
78 phone app. Natural areas such as in the UC Natural Reserve System are sampled,  
79 analyzed for eDNA, and results are posted online in an interactive website and shared  
80 with natural areas managers and stakeholders.

81           Diverse communities of researchers and the public have helped develop the  
82 research questions and the functionality of CALeDNA. Several California institutions  
83 with their own community science programs have partnered to organize bioblitzes and  
84 plan research projects (see section 4). Now, the program is focused on building an  
85 inclusive network with land managers, policy informers, naturalists, students, and  
86 university research scientists, as people are coming together to participate in the  
87 analysis of the open results and use the information to address grand challenges of how  
88 to steward ecosystems.

## 89 **2. eDNA: the new biodiversity monitoring tool?**

90

91           Environmental DNA is a promising solution to the challenge of monitoring  
92 marine, terrestrial and freshwater ecosystems (Bohmann et al. 2014; Thomsen and  
93 Willerslev 2015). eDNA survey methods rely on all organisms shedding DNA as they  
94 live and decay, and these DNA molecules can be isolated, sequenced, and identified  
95 (Taberlet et al. 2012). An eDNA-based inventory of a location is a kind of forensic  
96 reconstruction of the local organismal community (Thomsen and Willerslev 2015). DNA  
97 persists in surface soils and shallow sediments for variable lengths of time (mere days  
98 in the ocean, Lafferty et al., 2018; weeks or even several years in terrestrial  
99 environments, Barnes and Turner 2016). In all ecosystems, temperature, UV light,  
100 microbial metabolic activity, and eDNA shedding rates play complex roles in the  
101 production, movement, and degradation rates of eDNA (Barnes and Turner 2016;  
102 Deiner et al. 2017). Under certain conditions, like the bottom of a lake, eDNA may be  
103 protected from these physical and chemical threats, and may also be sheltered from

104 consumption by active microorganisms (Palchevskiy and Finkel, 2006), leading to its  
105 persistence for up to thousands of years (e.g., Graham et al., 2016).

106 Next generation (high-throughput) sequencing technologies, such as Illumina  
107 MiSeq, HiSeq or NextSeq systems, substantially reduce the cost of DNA sequence data  
108 and allow thousands of different sequences to be retrieved simultaneously. This  
109 enabled the emergence of DNA 'metabarcoding', in which specific DNA regions from  
110 any organism can be targeted, sequenced, and matched to reference DNA barcodes that  
111 communities around the globe have generated from voucher specimens for over three  
112 decades. Different barcoding regions are better for different constellations of organisms,  
113 but multiple regions can be targeted with metabarcoding, allowing a simultaneous  
114 inventory of biodiversity across organismal kingdoms, for costs currently as low as \$35  
115 a sample, and likely less in the future, as we optimize third generation sequencing  
116 technologies, such as PacBio (in progress). For CALeDNA, 4-6 regions are used to  
117 obtain metabarcodes from each sample, yielding lists of well over 1000 unique taxa per  
118 sample, representing all kingdoms of life. eDNA approaches are ideally suited for  
119 intensive and taxonomically broad biodiversity monitoring programs, where they may  
120 complement traditional field surveys, such as programs to test the impacts of global and  
121 local stressors on California ecosystems (Bohmann et al. 2014; Thomsen and Willerslev  
122 2015).

123 The promise of eDNA monitoring has led to widespread development and  
124 application of this technique including large scale biodiversity monitoring networks  
125 (GEOBON and MBON), federal monitoring agencies (USGS and NOAA), local agencies  
126 (SCCWRP [www.sccwrp.org](http://www.sccwrp.org)), and research institutions (NHMLA). California's research  
127 communities have pioneered DNA-based environmental assessments (e.g., Southern  
128 Sierra Nevada Critical Zone Observatory and the Aronson lab, see Aciego et al., 2017;

129 Stanford Center for Ocean Solutions, see Andruszkiewicz et al., 2018). Diverse  
130 researchers and resource managers have been using eDNA approaches to detect and  
131 monitor endangered species, track the emergence and spread of invasive species, and  
132 inventory biodiversity in a wide variety of habitats from submarine canyons to alpine  
133 forests demonstrating the breadth of applications of this emerging technique. Work  
134 thus far has still largely focused on water sampling or focused on limited groups of taxa  
135 such as bacteria or fish (as in above two references).

136

### 137 **3. CALeDNA program orientation**

138

#### 139 *3.1. Study sites*

140 Study areas can be chosen in two ways: (1) by researchers with projects, who  
141 propose collection in certain areas, habitat types, or transects, and who may organize  
142 group eDNA collection events, or (2) by community science volunteer choice.  
143 Volunteers can collect for CALeDNA from anywhere they please as long as they have  
144 proper permission such as collection permits or written permission from a landowner.  
145 While obtaining permission to collect eDNA may take time, it has not discouraged  
146 volunteers interested in adding an area of their interest to the CALeDNA map (Figure  
147 1). CALeDNA reimburses all permitting fees incurred. This can also benefit groups, for  
148 example, one volunteer—a teacher—independently obtained a permit for Vasona Lake  
149 Park in Summer 2018, and brought the Youth Science Institute summer camp students  
150 to collect. Overall, the contribution of sites by the public and by researchers ensures a  
151 diverse sampling, increases awareness of accessible natural areas for all parties, and  
152 strives for sufficient sampling to meet research needs that will result in publications.

153           At the time of writing this, one third of our samples are from UC Natural  
154 Reserves. The UC boasts the largest university reserve system in the world, at 39 (soon  
155 40) reserves totaling over 756,000 acres. Most of these reserves aren't open to the public.  
156 UC researchers may visit, accompany volunteers, or even just send volunteers, to hike  
157 through and sample eDNA. The reserves are ideal to provide a biodiversity baseline for  
158 the state because they include coastal to montane biomes.

159           All reserves have hosted numerous traditional biodiversity surveys, and we use  
160 these to assess the extent of overlap between eDNA metabarcoding and traditional  
161 sampling, which can illuminate the bias as well as complementarity in eDNA and  
162 human surveys. The reserves offer additional abiotic data that may strengthen statistical  
163 analyses and models to describe eDNA patterns. These include weather station and  
164 tower data, such as that implemented by Institute for the Study of Ecological and  
165 Evolutionary Climate Impacts (<https://iseeci.ucnrs.org>), and NASA pre-HyspIRI  
166 flights, where for 7 years, data have been collected from pathways intentionally situated  
167 over UC reserves.

168

### 169 *3.2. The sampling experience*

170           Volunteers may join a bioblitz, or may sample a site on their own. In either case,  
171 they would receive a sampling kit of gloves, tubes, and an optional meter for collecting  
172 abiotic data (Figure 2a). Each sampling kit is used together with an electronic webform  
173 for smartphones and tablets or with a paper form. Forms are for the collector to provide  
174 important collection metadata (Figure 2b). These metadata fields are more than the  
175 minimum information currently required for meeting sample description standards  
176 (e.g. NCBI Bioproject), but additional data make samples more likely to be used for

177 analysis. CALeDNA data standards are inspired by the Global Genome Biodiversity  
178 Network (ggbn.org).

179 Our webforms are made using the KoBoToolbox (kobotoolbox.org) platform to  
180 create and curate webform information. Results are backed up in real time. CALeDNA  
181 is dynamic, and different projects may require different metadata. Kobo Toolbox allows  
182 multiple forms to be created with the same minimum essential questions.

183

### 184 3.3. *The 'eDNA museum'*

185 Upon receipt of the collected samples, each eDNA sample tube is treated as a  
186 valuable biological research collection. Samples get archived into a -80°C freezer that is  
187 part of the permanent “Dickey Collection” at UCLA, or archived in freezers at other UC  
188 campuses as satellite collections. We intend for the CALeDNA samples to be used to  
189 track environmental change over the next hundred years. When samples are processed  
190 and results are published online, the physical locations of the archived samples are  
191 reported and archived as part of the sample metadata.

192 Samples and kit materials are physically returned to UC campuses via pick up,  
193 drop off or Fedex. For the latter, we email shipping labels to volunteers so they do not  
194 need to pay out of pocket.

195 We encourage sample return within one week of collection. Many volunteers  
196 collect samples over long treks; in these cases, we request they refrigerate samples (4°C)  
197 until they can be shipped back all at once for archiving in our freezers. Tests have  
198 shown that freezing and thawing samples causes DNA profiles to vary, but maintaining  
199 a stable temperature helps to preserve the balance of DNA profiles  
200 ([www.earthmicrobiome.org](http://www.earthmicrobiome.org); Thompson et al., 2017). Considering the rapid  
201 advancement in technology, and our hopes that these eDNA samples will be used in



202 research far in to the future, we chose to avoid adding stabilizing buffers to the samples  
203 that may pose unknown effects to the sample integrity.

204

### 205 *3.4. Sample collection and laboratory processing*

206 CALeDNA staff and interns continuously generate DNA data as sample  
207 collections increase. Under current funding, we are sequencing 10% of the samples  
208 received and make these results immediately open to the public.

209 Sample collection involves collecting three tubes from a site; these are treated as  
210 biological replicates. These replicates are thawed on ice, and a subsample of soil or  
211 sediment from each is pooled into a single tube that is mixed and used for DNA  
212 extraction. As a dynamic program, sampling methods may diversify in the future. For  
213 example, the Aronson Lab (UCR) is engineering rollers as eDNA surface collectors,  
214 along with wearable passive eDNA samplers.

215 DNA is processed through a series of steps to generate metabarcoding libraries.  
216 Because contamination from the sample collector or from the lab is a common problem  
217 in eDNA research, sometimes field ‘blanks’ are collected, and when extracting DNA, a  
218 ‘blank’ sample is also extracted as every batch of samples are processed. The details of  
219 the DNA preparation pipeline and CALeDNA protocols can be found on our website  
220 ([www.ucedna.com](http://www.ucedna.com)) in the “researchers” space [DOIs to protocols will be assigned upon  
221 acceptance]. Each barcode region we target requires three separate PCR reactions as  
222 ‘technical replicates’ that help reduce reaction bias in the results, meaning for 5  
223 barcoding regions, there may be 18 reactions per sample. Metabarcoding libraries are  
224 sequenced on a MiSeq machine that generates paired reads 2 x 300 base pairs long,  
225 meaning when put together, each sequence can be up to 600 base pairs. This allows us  
226 to use lengthier barcode regions such as a portion of the *CO1* marker (Leray et al., 2013)

227 to inventory animals. We aim to sequence a minimum of 25,000 paired reads for each  
228 barcoding region for each sample.

229 DNA data are deposited in the National Center for Biotechnology Information  
230 (NCBI) Sequencing Read Archive. These DNA data are processed through a series of  
231 software in the *Anacapa Toolkit* (Curd et al., submitted;  
232 <https://www.biorxiv.org/content/early/2018/12/07/488627>) that was specifically  
233 developed for CALeDNA's multilocus metabarcoding approach. The toolkit combines  
234 state-of-the-art methods and is flexible to handle many kinds of eDNA data. CALeDNA  
235 researchers coordinating with eDNA researchers from academic, non-profit (Code for  
236 Science and Society), and government spheres to help onboard new user groups to  
237 *Anacapa*, which create opportunities for data integration.

238 Results are a list of taxa and the number of sequences that matched each one in  
239 each sample. The taxa may be identified to the level of species or limited to a higher  
240 rank such as genus or family, depending on the completeness of DNA barcode  
241 reference databases and the number of diagnostic DNA bases for that particular  
242 organism. CALeDNA scientists are working to solve this issue in the Nielsen Lab at UC  
243 Berkeley, but even in despite of this caveat, plenty of biodiversity patterns can be  
244 gleaned from higher taxonomic levels, like family, or from sheer genetic diversity.

245

### 246 3.5. Open data and results

247 To allow users to track our progress once samples are received, we put the field  
248 data collected by the community scientist online shortly after data are received. To  
249 make our results open and accessible, the eDNA results are deposited online shortly  
250 after processing through *Anacapa* and removing contaminants. Our impetus for open  
251 data is that scientists around the world are increasingly committing to the FAIR data

252 principles ([FORCE11.org](http://FORCE11.org)) of findability, accessibility, interoperability, and re-usability.

253 However, because endangered species may more easily be poached with help of eDNA  
254 leads, the CALeDNA website omits the specific sites where IUCN redlisted species have  
255 been found.

256 The *Anacapa Toolkit* is linked with an interactive results analysis platform called  
257 *ranacapa* (Kandlikar et al., 2018) that allows users to execute the same first-pass  
258 biodiversity data analyses of research projects as professional community ecologists  
259 typically do, but the automation in *ranacapa* relieves users of the need to code or use  
260 advanced statistical software. Plots and statistics are produced with explanations aimed  
261 at the undergraduate level. This enables community science users to reproduce results  
262 CALeDNA reports on the website or in scientific journals. Because data and tools are  
263 shared early in the analysis stage, community scientists may make some discoveries  
264 first, report them to CALeDNA, and through this feedback loop, earn co-authorship on  
265 research publications while bringing attention to the biodiversity in areas they care  
266 about.

267

#### 268 **4. CALeDNA research project vignettes**

269

##### 270 *4.1. The Pillar Point project: assessing overlap between eDNA and human observation*

271 Our first bioblitz in early 2017 was in collaboration with the California Academy  
272 of Sciences (CAS) and the Los Angeles Natural History Museum (NHMLA) to explore a  
273 potential complementary trifecta for biodiversity monitoring: human observation  
274 (CAS), DNA barcode sequences from local species (NHMLA), and eDNA (CALeDNA).  
275 Since 2012, CAS has been running monthly bioblitzes at the Pillar Point Harbor  
276 tidepools and adjacent areas within Half Moon Bay

277 (<https://www.inaturalist.org/projects/intertidal-biodiversity-survey-at-pillar-point>),

278 which is why this area was chosen. eDNA provides complementary results to human

279 observation (Figure 3; manuscript in preparation;

280 [https://data.ucedna.com/research\\_projects/pillar-point](https://data.ucedna.com/research_projects/pillar-point)).

281 *4.2. Point Fermin: do eDNA results improve with local DNA barcoding?*

282 NHMLA runs semi-annual bioblitzes in conjunction with Snapshot CalCoast

283 (<https://www.calacademy.org/calcoast>) during low tide at Point Fermin Park in San

284 Pedro, California (Figure 4a). They take photographs and make physical voucher

285 collections as well, which later are DNA barcoded for the *CO1* region as part of the

286 DISCO project <https://research.nhm.org/disco/disco.html>. eDNA collections

287 concurrent with NHMLA bioblitzes help us assess how much results improve with very

288 local DNA barcoding.

289

290 *4.3. California macro-ecological patterns*

291 From April 2017 to July 2017, a series of bioblitzes and independent community

292 science activities in parks and reserves brought in thousands of soil or sediment

293 samples to the CALeDNA collection. CALeDNA scientists selected 278 of these

294 represented latitudinal transects along forest, shrub/scrub, or coastal areas down the

295 state of California. Analysis of sequencing results reveals 25,283 unique taxonomic

296 entries. We are performing different kinds of diversity analyses (e.g. Figure 5) and

297 statistical modeling to ask what environmental factors influence biodiversity.

298

299 *4.4. Patterns of biodiversity along the California coast*

300 Together with over two dozen colleagues from California State University

301 campuses and coastal reserves, CALeDNA coordinated two distributed bioblitzes to

302 sample along a 1200 km span of coast from Arcata to San Diego (Figure 4b). Over 80  
303 phyla were identified and now, the team is asking how their presence predicts coastal  
304 health and uniqueness. These bioblitzes will be repeated to monitor coastal biodiversity  
305 change.

306

#### 307 *4.5. Persistence of eDNA in vernal pools*

308 Vernal pools are temporary wetlands, filled by substantial rainy seasons,  
309 snowmelt, or groundwater. The pools host many California endemic species with  
310 special adaptations to pool depth, morphology and geochemistry. CALeDNA  
311 researchers from the UC Merced Dawson and Sexton labs are studying eDNA of five  
312 vernal pools on the UC Merced Vernal Pool and Grassland Reserve to build a more  
313 comprehensive taxon inventory (Figure 4c).

314

#### 315 *4.6. Invasive grasses in shrub/open forests*

316 Invasive plants alter the community composition of fungi (Hawkes et al., 2006)  
317 plants (Gaertner et al., 2014) and microbiota (van der Putten et al. 2007) in the systems  
318 that they invade. The Fort Ord Natural Reserve has supported multi-day bioblitzes that  
319 have added nearly 200 samples to the CALeDNA collection with associated metadata of  
320 which sites have invasive grasses. UCSC graduate student Sabrina Shirazi is identifying  
321 associations between invasive species and the rest of the community detected with  
322 eDNA.

323

#### 324 *4.7. Biodiversity across lagoon systems*

325 UC graduate students steer many CALeDNA research projects. Tiara Moore  
326 (UCLA; Fong Lab) brings community scientists to Carpinteria and Upper Newport Bay

327 to sample sediment from different areas of lagoons (Figure 4e). She is evaluating the  
328 ability of eDNA to inventory community species and associate them with  
329 environmental stress response. DNA is being used in metabarcoding and also run on a  
330 GeoChip (Glomics, Inc) that quantifies the presence of 22,000+ genes involved in stress  
331 response and ecosystem functioning.

332

#### 333 *4.8. Burn sites*

334 California has experienced and increase in fires and burn intensity that have  
335 devastated areas that are normally spared as refugia. CALeDNA community science  
336 volunteers and UC undergraduate classes began sampling paired burned and unburned  
337 sites (Figure 4f), and began resampling sites that were affected by fire. This will enable  
338 CALeDNA researchers to track biodiversity change after fire.

339

#### 340 *4.9. eDNA to describe the desert*

341 UC Burns Piñon Ridge Reserve, Anza Borrego Reserve, and Pioneertown  
342 Mountain Preserve have hosted bioblitzes to help us understand the value of eDNA to  
343 detect a biodiversity in desert ecosystems (Figure 4g,h). Community scientists like  
344 [NAME OBSCURED] and Friends of the Desert Mountains contribute substantial  
345 collections for CALeDNA.

346

#### 347 *4.10. Exploring eDNA methods*

348 The Shapiro lab at UCSC has tested how different approaches in preparing  
349 metabarcode libraries influence eDNA results that will help us tune methods to make  
350 CALeDNA research more efficient, low-cost, and have less technical bias. Past results

351 have identified amplification enzymes that amplify DNA with less bias (Nichols et al.,  
352 2018). They continue to test technical effects on eDNA results.

353

## 354 *5. eDNA in undergraduate education*

355

### 356 *5.1. Authentic research in the microbiology classroom*

357 In Winter 2017, the newly launched CALeDNA initiative began a partnership  
358 with the UCLA Microbiology, Immunology, & Molecular Genetics (MIMG)  
359 department's Course-based Undergraduate Research Experience (CURE) curriculum.  
360 CUREs have been demonstrated to provide a more inclusive avenue for students that  
361 might not otherwise have the opportunity to participate in research (Auchincloss et al.  
362 2014). The MIMG CURE is a two-quarter research immersion curriculum in which  
363 upper-division undergraduates work in teams to formulate and test their own  
364 hypotheses regarding soil microbial ecology using eDNA and traditional bacterial  
365 cultivation methods (Shapiro et al. 2015). Using the CALeDNA sample collection kits  
366 and eDNA analysis tools, undergraduates have compared the soil microbiomes of  
367 California native and invasive plant species, natural and managed ecosystems, and  
368 studied the effects of human impact and burning on microbiomes.

369 Undergraduates connect with graduate students doing related eDNA research  
370 who visit the classrooms, and we hope this encourages students to consider graduate  
371 careers. This partnership between CALeDNA and MIMG inspired the development of  
372 eDNA and microbiology analysis tools spearheaded by graduate students and  
373 instructors, such as *ranacapa* (Kandlikar et al. 2018) and PUMA (Mitchell et al., in  
374 review; <https://www.biorxiv.org/content/early/2018/11/29/482380>). Several MIMG  
375 students have joined the CALeDNA labs as research interns.

376

377 *5.2. eSIE: Environmental DNA for Science Investigation and Education*

378

379 The Howard Hughes Medical Institute (HHMI) funded a novel project,  
380 **eSIE: Environmental DNA for Science Investigation and Education**, led by professors  
381 Wayne (UCLA) and Shapiro (UCSC). This program aims to educate and encourage  
382 undergraduates to enter STEM fields through field-based and flipped learning courses,  
383 workshops, and research, where eDNA gives entrée into the diverse natural and social  
384 sciences it can inform. An introductory course for freshmen and transfer students  
385 debuted in Fall 2018: *California's DNA: A Field Course* (Figure 6, left). A 4-credit course,  
386 *Biodiversity in the Age of Humans*, is planned for Spring 2019 and will make use of the  
387 active learning classrooms at UCLA and UCSC campuses.

388

389 In Summer 2018, we launched two short-term *CALeDNA Summer Research*  
390 *Institute* sessions, in the Santa Monica Mountains (Figure 6), and in Santa Cruz, on the  
391 UCSC campus. The Institute was open to UCLA and UCSC undergraduates and  
392 extended to California State University, Los Angeles and Dominguez Hills. Activities  
393 were designed to prepare participants for beginning research projects in molecular labs.  
394 UCLA and UCSC offered eleven positions for 10-week paid summer research  
395 internships to work with 6 different professors after the Institute.

396

397 **6. Building a stronger eDNA community**

398

399 We hope to shatter the paradigms of the science that community scientists can  
400 do. We are continuously building resources for diverse user groups to use CALeDNA



401 results and connect with university researchers through our web interface and our  
402 bioblitzes. A team of graduate student Information Architects as well as an experienced  
403 web programmer with a passion for science were crucial to the production of the  
404 website. We encourage feedback and ideas for how to serve the community, and how to  
405 use eDNA science to inform policy.

406         In the next phase of the program we will tie CALeDNA into the Earth  
407 BioGenome Project (EBP; Lewin et al., 2018). The EBP is a moonshot to sequence the  
408 genomes of all eukaryotes on Earth. There are approximately 9000 eukaryotic  
409 taxonomic families on Earth (Lewin et al., 2018), and at least 35,000 species in California.  
410 CALeDNA will provide information on where species are distributed and where new  
411 species may occur, so that those places may be sampled for the EBP collections. Our  
412 research teams are beginning to invent ways to use entire genomes to monitor  
413 demographic and evolutionary change with eDNA, not just occurrence.

414         The future will require a tremendous task force of CALeDNA community  
415 scientists, naturalists, observers, local scientific societies, biological collections and  
416 information curators, to help the EBP effort lead to solutions in California. Together,  
417 California can build a biodiversity-responsible and DNA-innovative economy to meet  
418 the challenges of climate change and a growing population.

419

420 **Acknowledgements:** We thank the University of California Office of the President  
421 Catalyst Program (CA-16-376437), the Howard Hughes Medical Institute Grant  
422 (GT10483), NSF-DEB 1644641 (NK), NSF-DGE 1650604 (GK), NSF-GRFP 2015204395  
423 (ZG). We thank Michael Dawson (UC Merced) for contributing to the CALeDNA  
424 program design, for coordinating the coastal bioblitzes, and for constructive comments  
425 on the manuscript. We thank the following people who have guided the CALeDNA

426 program: Regina Wetzler, Dean Pentcheff, and Adam Wall of the Natural History  
427 Museum Los Angeles, Eric Crandall (CSUMB), Alison Young and Rebecca Johnson of  
428 the California Academy of Sciences, Greg Suba (CNPS) and Joseph Miller (UCSC). We  
429 thank former interns Amber DeVries, Laura Rabichow, Larysa Bulbenko, Aoife Galvin,  
430 Audrey Mahinan, and Eric Beraut. We thank the UCLA UX Team for guiding the web  
431 development. We thank all UC Natural Reserve Managers who made CALeDNA  
432 collection possible and inspired research questions, and especially acknowledge the  
433 contribution of the late Don Canestro (UCSB).

434

435

436

437

438

439

440

441 **Literature Cited:**

442

443 Aciego SM, Riebe CS, Hart SC et al. 2017. Dust outpaces bedrock in nutrient supply to  
444 montane forest ecosystems. *Nature Communications*, 8:14800.

445 doi:[10.1038/ncomms14800](https://doi.org/10.1038/ncomms14800).

446

447 Andruszkiewicz EA, Starks HA, Chavez FP et al. 2017. Biomonitoring of marine  
448 vertebrates in Monterey Bay using eDNA metabarcoding. *PLOS ONE*, 12:e0176343.

449 doi:[10.1371/journal.pone.0176343](https://doi.org/10.1371/journal.pone.0176343).

450

451 Auchincloss LC, Laursen SL, Branchaw JL et al. 2014. Assessment of course-based  
452 undergraduate research experiences: a meeting report. *CBE Life Sci Educ*, 13:29–40.  
453 doi:[10.1187/cbe.14-01-0004](https://doi.org/10.1187/cbe.14-01-0004).

454  
455 Barnes MA & Turner CR. 2016. The ecology of environmental DNA and implications for  
456 conservation genetics. *Conserv Genet*, 17:1–17. doi:[10.1007/s10592-015-0775-4](https://doi.org/10.1007/s10592-015-0775-4).

457  
458 Bohmann K, Evans A, Gilbert MTP et al. 2014. Environmental DNA for wildlife biology  
459 and biodiversity monitoring. *Trends in Ecology & Evolution*, 29:358–367.  
460 doi:[10.1016/j.tree.2014.04.003](https://doi.org/10.1016/j.tree.2014.04.003).

461  
462 Ceballos G & Ehrlich PR. 2018. The misunderstood sixth mass extinction. *Science*,  
463 360:1080–1081. doi:[10.1126/science.aau0191](https://doi.org/10.1126/science.aau0191).

464  
465 Deiner K, Bik HM, Mächler E et al. 2017. Environmental DNA metabarcoding:  
466 Transforming how we survey animal and plant communities. *Molecular Ecology*,  
467 26:5872–5895. doi:[10.1111/mec.14350](https://doi.org/10.1111/mec.14350).

468  
469 Gaertner M, Biggs R, Beest MT et al. 2014. Invasive plants as drivers of regime shifts:  
470 identifying high-priority invaders that alter feedback relationships. *Diversity and*  
471 *Distributions*, 20:733–744. doi:[10.1111/ddi.12182](https://doi.org/10.1111/ddi.12182).

472  
473 GBIF. 2018. “Adding sequence-based identifiers to backbone taxonomy reveals 'dark  
474 taxa' fungi”. <https://www.gbif.org/news/2LrgV5t3ZuGeU2WIymSEuk/adding->

475 [sequence-based-identifiers-to-backbone-taxonomy-reveals-dark-taxa-fungi](#). Accessed  
476 November 22,2018.

477

478 Graham RW, Belmecheri S, Choy K et al. 2016. Timing and causes of mid-Holocene  
479 mammoth extinction on St. Paul Island, Alaska. PNAS, 113:9310–9314.  
480 doi:[10.1073/pnas.1604903113](https://doi.org/10.1073/pnas.1604903113).

481

482 Hawkes CV, Belnap J, D'Antonio C et al. 2006. Arbuscular Mycorrhizal Assemblages in  
483 Native Plant Roots Change in the Presence of Invasive Exotic Grasses. Plant Soil,  
484 281:369–380. doi:[10.1007/s11104-005-4826-3](https://doi.org/10.1007/s11104-005-4826-3).

485

486 Kandlikar GS, Gold ZJ, Cowen MC et al. 2018. ranacapa: An R package and Shiny web  
487 app to explore environmental DNA data with exploratory statistics and interactive  
488 visualizations. F1000Research, 7:1734. doi:[10.12688/f1000research.16680.1](https://doi.org/10.12688/f1000research.16680.1).

489

490 Lafferty KD, Benesh KC, Mahon AR et al. 2018. Detecting Southern California's White  
491 Sharks With Environmental DNA. Front Mar Sci, 5. doi:[10.3389/fmars.2018.00355](https://doi.org/10.3389/fmars.2018.00355).

492

493 Leray M, Yang JY, Meyer CP et al. 2013. A new versatile primer set targeting a short  
494 fragment of the mitochondrial COI region for metabarcoding metazoan diversity:  
495 application for characterizing coral reef fish gut contents. Front Zool, 10:34.

496 doi:[10.1186/1742-9994-10-34](https://doi.org/10.1186/1742-9994-10-34).

497

498 Lewin HA, Robinson GE, Kress WJ et al. 2018. Earth BioGenome Project: Sequencing life  
499 for the future of life. PNAS, 115:4325–4333. doi:[10.1073/pnas.1720115115](https://doi.org/10.1073/pnas.1720115115).

500

501 Myers N, Mittermeier RA, Mittermeier CG et al. 2000. Biodiversity hotspots for  
502 conservation priorities. *Nature*, 403:853–858. doi:[10.1038/35002501](https://doi.org/10.1038/35002501).

503

504 Nichols RV, Vollmers C, Newsom LA et al. 2018. Minimizing polymerase biases in  
505 metabarcoding. *Mol Ecol Resour*, 18:927–939. doi:[10.1111/1755-0998.12895](https://doi.org/10.1111/1755-0998.12895).

506

507 Palchevskiy V & Finkel SE. 2006. *Escherichia coli* Competence Gene Homologs Are  
508 Essential for Competitive Fitness and the Use of DNA as a Nutrient. *J Bacteriology*,  
509 188:3902–3910. doi:[10.1128/JB.01974-05](https://doi.org/10.1128/JB.01974-05).

510

511 Shapiro C, Moberg-Parker J, Toma S et al. 2015. Comparing the Impact of Course-Based  
512 and Apprentice-Based Research Experiences in a Life Science Laboratory Curriculum. *J*  
513 *Microbiol Biol Educ*, 16:186. doi:[10.1128/jmbe.v16i2.1045](https://doi.org/10.1128/jmbe.v16i2.1045).

514

515 Taberlet P, Coissac E, Hajibabaei M et al. 2012. Environmental DNA. *Molec Ecol*,  
516 21:1789–1793. doi:[10.1111/j.1365-294X.2012.05542.x](https://doi.org/10.1111/j.1365-294X.2012.05542.x).

517

518 Thompson LR, Sanders JG, McDonald D et al. 2017. A communal catalogue reveals  
519 Earth’s multiscale microbial diversity. *Nature*, 551:457–463. doi:[10.1038/nature24621](https://doi.org/10.1038/nature24621).

520

521 Thomsen PF & Willerslev E. 2015. Environmental DNA – An emerging tool in  
522 conservation for monitoring past and present biodiversity. *Biol Cons*, 183:4–18.  
523 doi:[10.1016/j.biocon.2014.11.019](https://doi.org/10.1016/j.biocon.2014.11.019).

524

525 van der Putten WH, Klironomos JN & Wardle DA. 2007. Microbial ecology of biological  
526 invasions. ISME J, 1:28–37. doi:[10.1038/ismej.2007.9](https://doi.org/10.1038/ismej.2007.9).

527

528

529

530

531

532

533

534

535

536

537

538

539

540

541

542

543

544

545

546

547

548

549 Figure 1. Top: Flowchart of how CALeDNA works. Bottom: Map of California showing  
550 the sites sampled by volunteers, and the proportion of samples for which eDNA results  
551 are publicly available.. Blue spots indicate the locations of UC Natural Reserves. Results  
552 from different organismal groups can be queried on the [www.ucedna.com](http://www.ucedna.com) 'explore  
553 data' pages and plotted against different maps (example here shown is the proportion  
554 of silt in soils). The intention is for the user to do qualitative data exploration and  
555 generate hypotheses based on spatial patterns.

556

557 Figure 1.

558

559

560

561

562

563

564

565

566

567

568

569

570

571

572

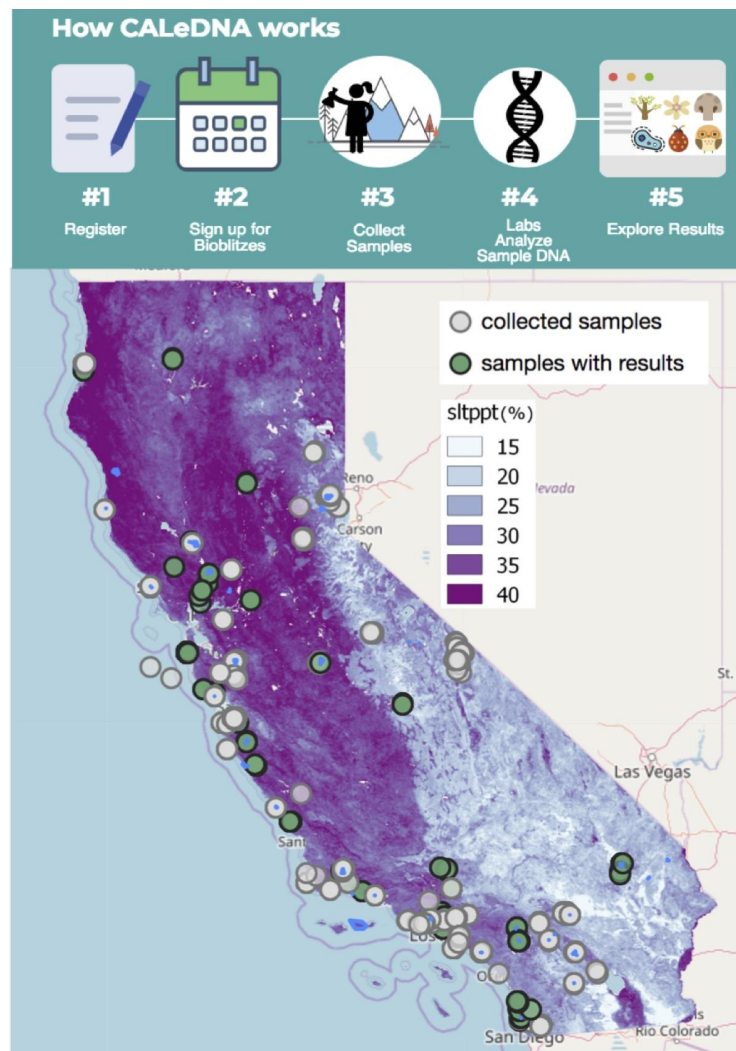

573 Figure 2. a. CALeDNA kit contents, including a pair of gloves, a set of three tubes for  
574 biological replicates packed inside a Whirl-Pak bag to protect tubes, a straw to sample  
575 sediment or to move large debris to expose topsoil, a ruler, and a meter. b. Webform  
576 fields the collector fills in when sampling a site.

577

578 Figure 2.

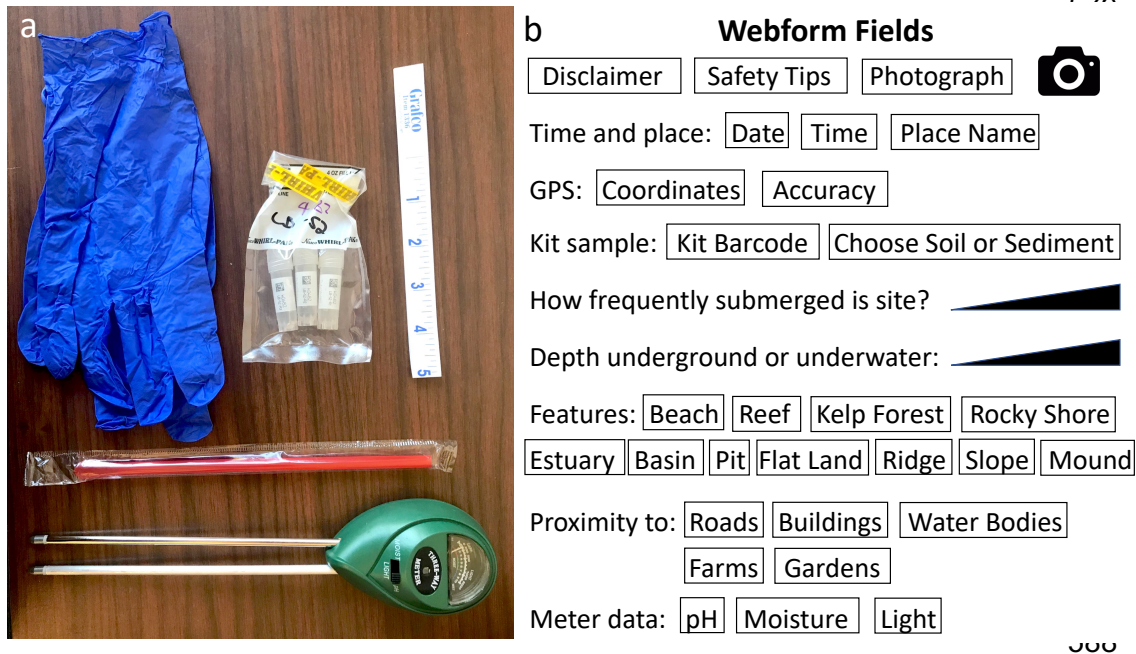

589

590

591

592

593

594

595

596

597



598 Figure 3. Pillar Point project overview. a. The project is an test of how observations,  
599 largely facilitated by the California Academy of Sciences iNaturalist program, integrate  
600 with local DNA barcoding efforts done by the Natural History Museum of Los Angeles  
601 Diversity Initiative for the Southern California Ocean (DISCO), and eDNA results from  
602 CALeDNA bioblitzes. These initiatives can cross-inform each other to broaden  
603 awareness of biodiversity that can be monitored through community science. b.  
604 Comparison of GBIF data, containing iNaturalist records and all other non-eBird  
605 observations, to eDNA. c. The Pillar Point project divides the region into three sections:  
606 an embankment (yellow), an unprotected exposed area containing accessible tidepools  
607 (blue), and the State Marine Protected Area (SMCA; red). The pins are eDNA sampling  
608 locations. The circles are GBIF observation records, colored by kingdom (blue is animal,  
609 green is plant, red is fungus). d. Area diversity showing the number of unique taxa  
610 observed from GBIF versus eDNA from the three sections of Pillar Point. Overlap is  
611 shared taxa. Colors for the sections are as in C.

612 Figure 3.

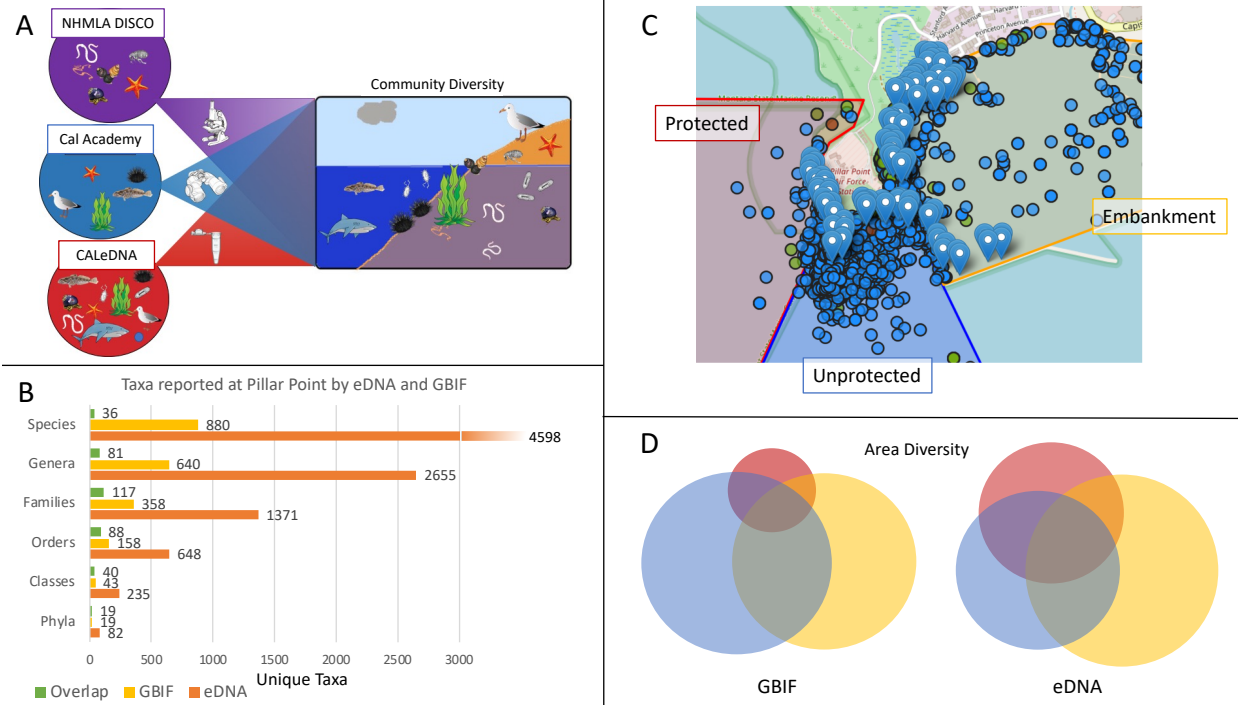

613

614

615

616

617

618

619

620

621

622

623

624

625

626

627 Figure 4. Project vignettes. a. NHMLA program coordinator [NAME OBSCURED]  
628 moves algae to uncover sediment for eDNA sampling by volunteers (inset). b. Left: the  
629 coastal bioblitz sampling scheme that occurs in the same weekend. Right: volunteer  
630 sampling the beach. c. Sampling the UC Merced Vernal Pool and Grassland Reserve.  
631 Biologists introduce their research to volunteers (here, [NAME OBSCURED], professor  
632 from CSULA, left, talks about fairy shrimp). d. Professors can be community scientists  
633 too: here [NAME OBSCURED], professor from CSUMB, hikes at UC Fort Ord Natural  
634 Reserve to collect for CALeDNA. e. [NAME OBSCURED] (left) samples along a lagoon.  
635 Volunteers (right) help count organisms using traditional ecology methods. f.  
636 Volunteer-submitted photos of paired burn samples from the Whittier Fire area. g.  
637 [NAME OBSCURED] sampling in the Mojave desert. She is now the CALeDNA web  
638 programmer. h. Left: Taxonomic richness is similar among the natural areas samples for  
639 the desert project. Oak Glen is a non-desert sample representative of DNA found in  
640 foothills that could wash into desert areas by runoff. Right: Presence of a taxon group  
641 (y-axis) across desert samples (x-axis). Variation prompts questions about ecological  
642 interactions among the stable members of the communities.

643

644

645

646

647

648

649

650

651 Figure 4.

652

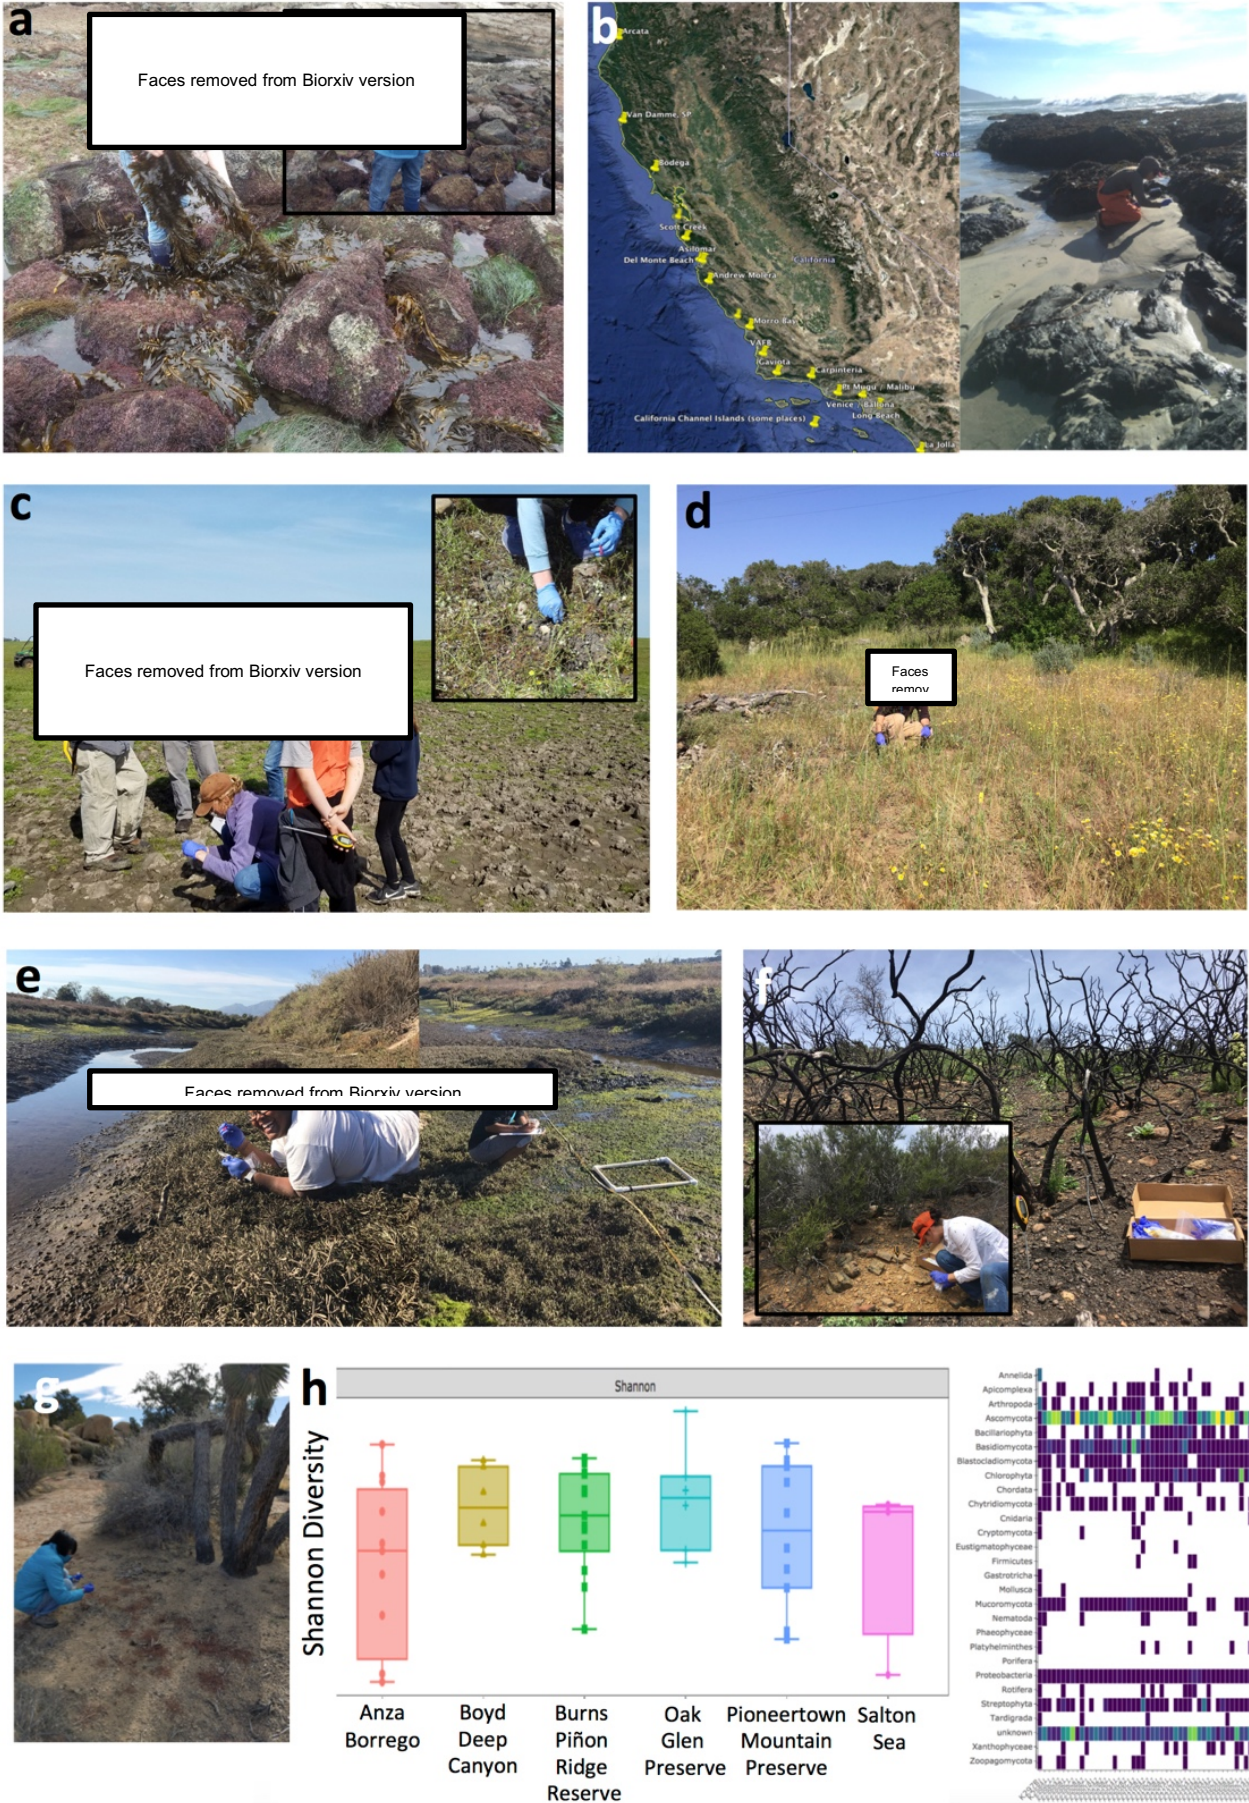

653 Figure 5. Taxonomic diversity plotted as a) unique taxon richness among phyla in  
654 results using different primers in metabarcoding to amplify different regions of DNA.  
655 16S was chosen to amplify from bacteria and archaea. 18S was chosen to amplify the  
656 broad diversity of eukaryotes. CO1 was chosen to amplify DNA from animals. FITS  
657 (also called fungal ITS) was chosen to amplify all fungi. PITS (also called plant ITS2)  
658 was chosen to amplify DNA from angiosperms. The specific primers and methods used  
659 are on the CALeDNA website Methods for Researchers section:  
660 [www.ucedna.com/methods-for-researchers](http://www.ucedna.com/methods-for-researchers). The ten most commonly found phyla were  
661 shown here. b. Non-metric multidimensional scaling plot (NMDS) showing beta  
662 diversity is similar for scrub and woodland habitats (left cluster), and these are very  
663 different from coastal samples (right). Each point represents one sample site, colored by  
664 the minor habitat it belong to. Habitat definitions from  
665 <https://www.wildlife.ca.gov/Data/CWHR/Wildlife-Habitats>.

666

667 Figure 5.

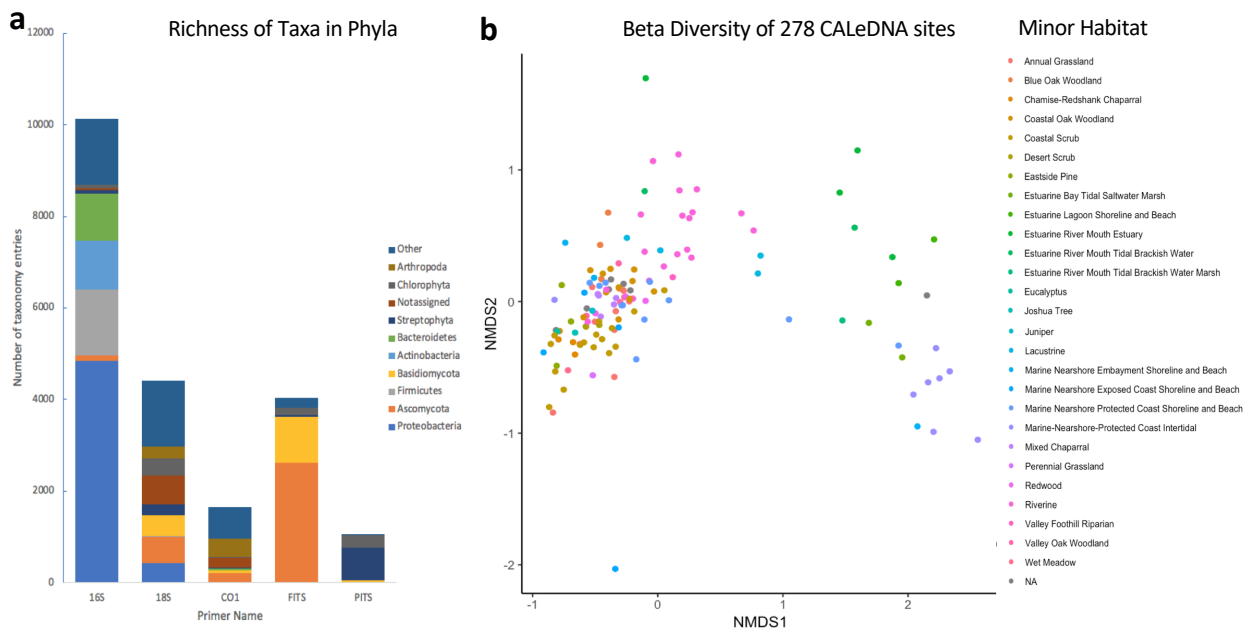

668

669

670

671 Figure 6. Left. The California's DNA: A field course sampling locations for Fall 2018.

672 Site number 1 is Carpinteria Salt Marsh Reserve, 2 is Stunt Ranch Reserve, 3 is the

673 Skirball area that burned in 2017, 4 is Franklin Canyon Park, 5 is the Los Angeles River

674 (Arroyo Seco), and 6 is the James San Jacinto Mountains reserve. The map was

675 generated in Google Earth Pro. Right. Participants at the CALeDNA Summer Research

676 Institute in Los Angeles. From left to right, [NAMES OBSCURED].

677

678

679

680 Figure 6.

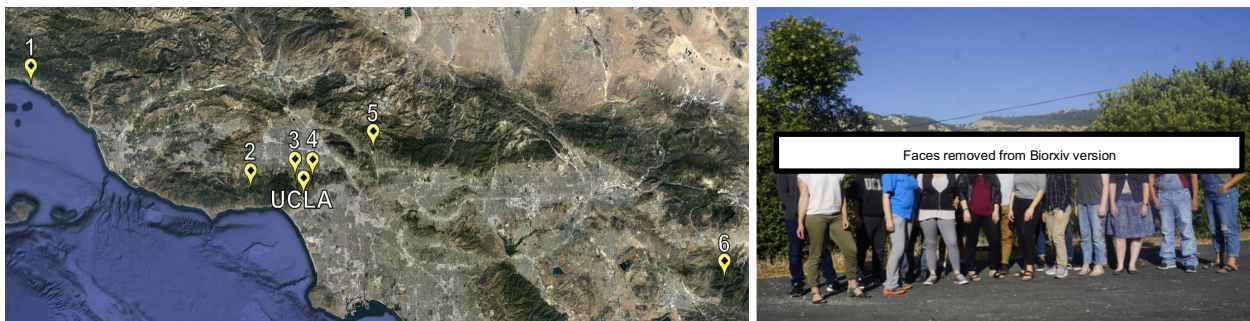

681

682

683

684

685 Note: Underlined words in the main text are intended for a sidebar glossary throughout

686 the paper.

687

688 Sidebar Glossary (*will appear in the order they are introduced in the text*):

689 **eDNA (environmental DNA):** DNA from environmental samples such as soil, air,  
690 surfaces, or water rather than directly from an organism. The DNA in the sample may  
691 be shed from a living or dead organism such as from skin cells, or from an entire  
692 organism that was collected as part of the sample, such as from a microbe. eDNA  
693 degrades over time as it is exposed to the elements, and so where and how long it can  
694 be detected depends on characteristics of the environment.

695 **Bioblitz:** hands-on, educational and fun community science activities such as bird or  
696 wildflower surveys. They usually occur in a day and often contribute to biological  
697 research, monitoring projects, or research resources (e.g., iNaturalist).

698 **UC Natural Reserve System:** A network of 39 (soon 40) natural reserves across  
699 California that total 756,000 acres of land, and 50 miles of coastal shoreland ([ucnrs.org](http://ucnrs.org)).  
700 The reserves function to save representatives of all of California's ecosystems for  
701 research, education, and public service.

702 **DNA barcodes:** Short DNA sequences of a region that varies in sequence among species  
703 and therefore can be used to match DNA to a species or strain. DNA barcodes are  
704 usually sequenced from voucher specimens.

705 **Metabarcoding:** Sequencing a specific DNA barcode region of a genome from multiple  
706 organisms within a single sample. The many resulting sequences are matched to known  
707 DNA barcodes allowing variants to be assigned to identify species present.

708 **Polymerase Chain Reaction (PCR):** A technique used in molecular biology to make  
709 many copies of a region of DNA to allow for sequencing. It is performed by adding a  
710 mixture of enzymes, free nucleotides, buffers and primers to DNA, and then putting the  
711 mixture through a series of specific heating and cooling incubations. Primers are short  
712 sequences designed to flank the segment targeted for copying and sequencing.

713 **Voucher specimen:** A whole organism or part thereof, such as a plant cutting for an  
714 herbarium specimen, that is preserved for scientific use and used as a reference to  
715 confirm identity.

716 **NASA pre-HyspIRI flights:** Since 2012, NASA has flown planes over parts of  
717 California, with priority over UC natural reserves, to collect various kinds of remote  
718 sensing data that describe the abiotic and biotic features of the local environment at  
719 high resolution. These data inform the HyspIRI satellite design under plan to launch in  
720 2020.

721 **FAIR Data Principles:** Principles of minimum standards for digital science information  
722 distribution to benefit data providers and data consumers, both machine and human,  
723 that were set in 2014 ([FORCE11.org](http://FORCE11.org)). Data should be Findable, Accessible,  
724 Interoperable, and Re-usable.

725 **Alpha diversity:** the mean species diversity or taxonomic richness in a location.

726 **Beta diversity:** a measure of diversity between areas, which helps describe diversity  
727 turnover at a regional scale. Beta diversity accounts for the number of taxa common to  
728 both areas and the number of unique taxa in each area. It describes the change in  
729 community composition from location to location.

730 **iNaturalist:** A community platform for photographing, geotagging, and identifying  
731 organisms. iNaturalist is a phone app maintained by the California Academy of  
732 Sciences. To date, nearly 187,000 species have been observed in 15,000,000 observations  
733 by 1.1M people.

734 **Global Biodiversity Information Facility:** A web-accessible database of all species  
735 observations and collections. It houses information for >1B species occurrence records.  
736 DNA data have only just begun to be included as an 'observation' of a species (UNITE;  
737 GBIF 2018).



738 **Flipped Learning Courses:** Courses where content is learned via media at home and  
739 classroom time is used to carry out exercises that apply content.

740

741
